# Supplementary material for: Multivariate indium–organic frameworks for highly efficient carbon dioxide capture and electrocatalytic conversion
Source: Royal Society of Chemistry journal article supplement (doi:10.1039/d2qi02020c), 2022-11-08
Supplement: d2qi02020c1.pdf [file d2qi02020c1.pdf]

## **Electronic Supplementary Material (ESI)**

*for*

### **Multivariate Indium-Organic Frameworks for Highly Efficient Carbon Dioxide Capture and Electrocatalytic Conversion**

Shuo Wang, Ying Wang, Jia-Min Huo, Wen-Yu Yuan\*, Peng Zhang, Shu-Ni Li, and Quan-Guo

Zhai\*

*Key Laboratory of Macromolecular Science of Shaanxi Province, Key Laboratory of  
Applied Surface and Colloid Chemistry, Ministry of Education, School of Chemistry &  
Chemical Engineering, Shaanxi Normal University, Xi'an, Shaanxi, 710062, China.*

## Section S1. Standard curves

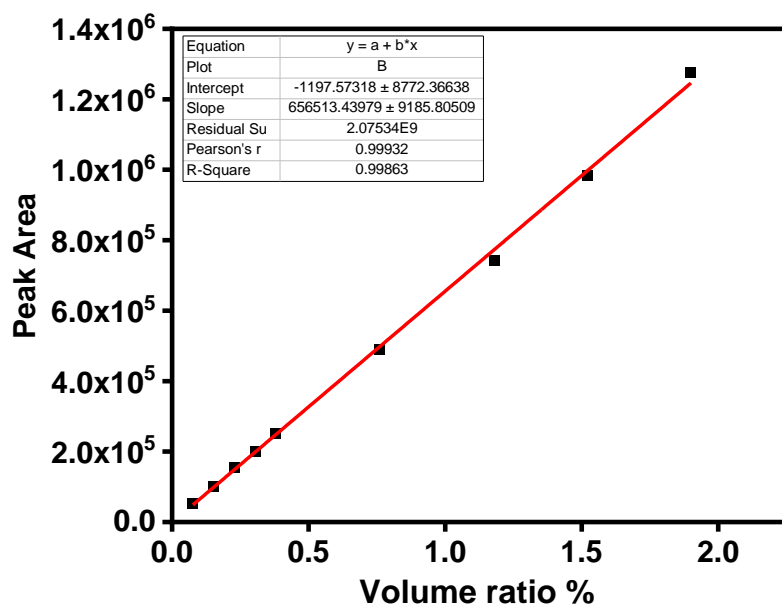

Fig. S1 Standard curve of H<sub>2</sub>.

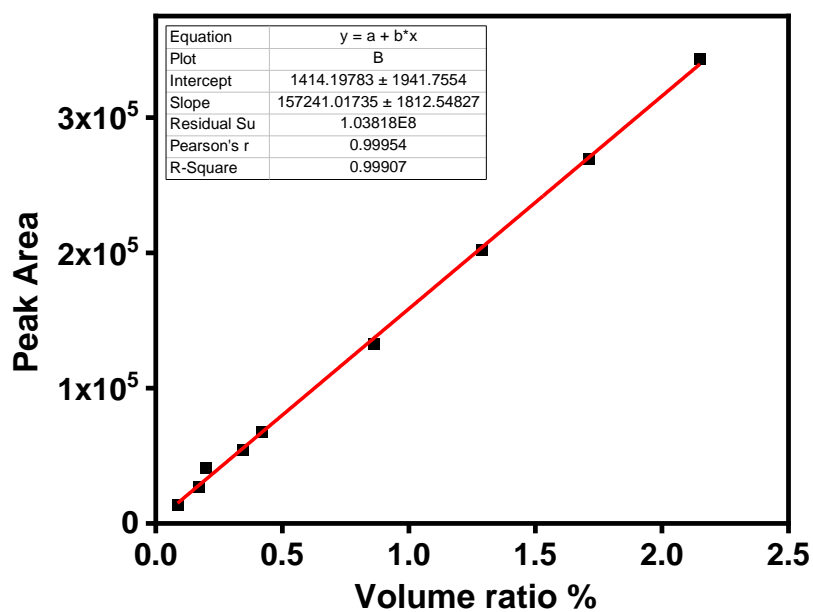

Fig. S2 Standard curve of CO.

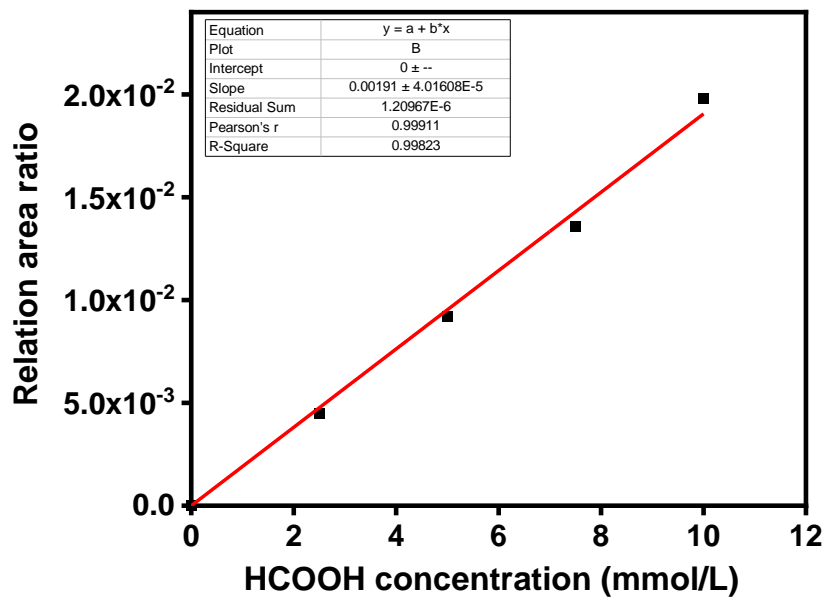

Fig. S3 Standard curve of HCOOH.

## Section S2. Supplementary figures and tables

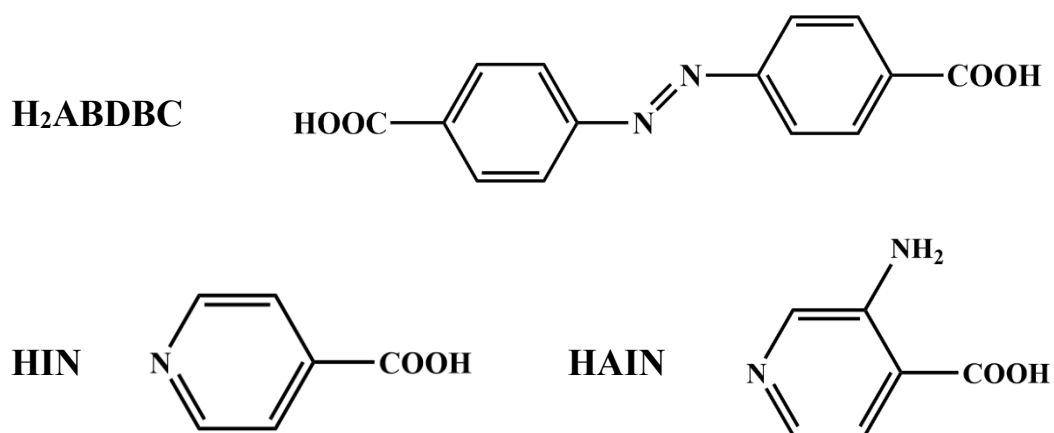

**Fig. S4** View of the structure of H<sub>2</sub>ABDBC, HIN and HAIN.

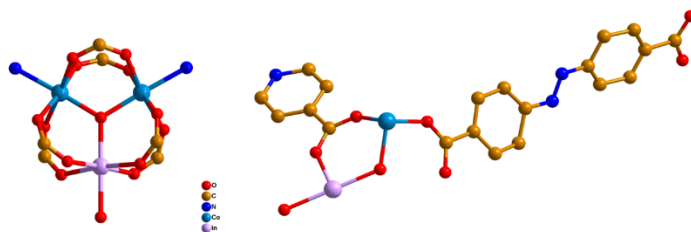

**Fig. S5** Structure of the InCo<sub>2</sub> cluster and asymmetric unit.

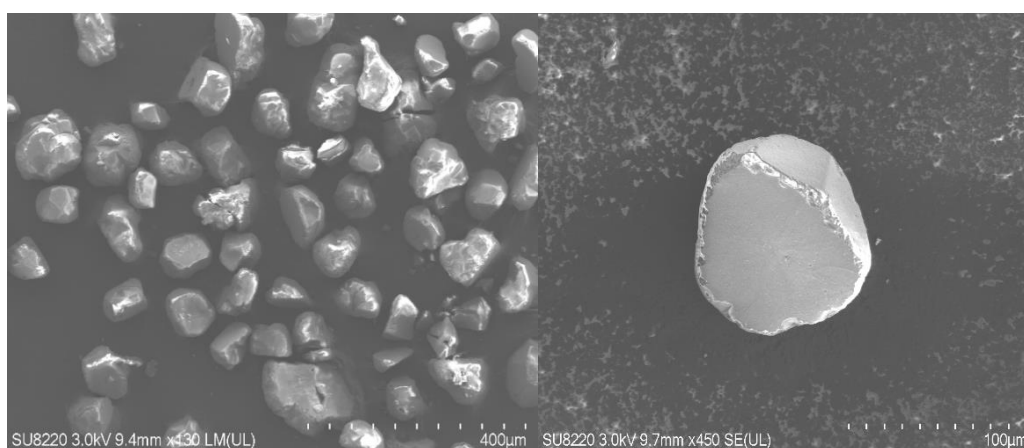

**Fig. S6** SEM of InCo-ABDBC-HIN.

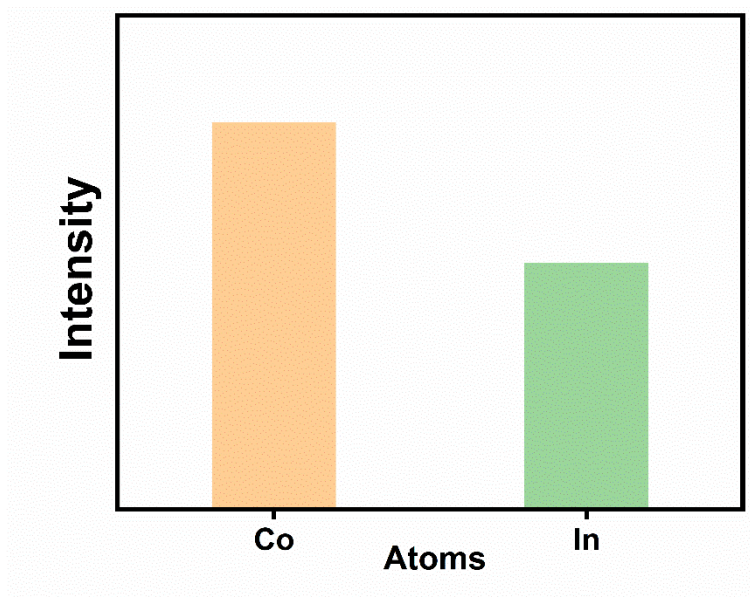

**Fig. S7** The atomic ratio of In:Co (1:1.6) of InCo-ABDBC-HIN from ICP-MS analysis.

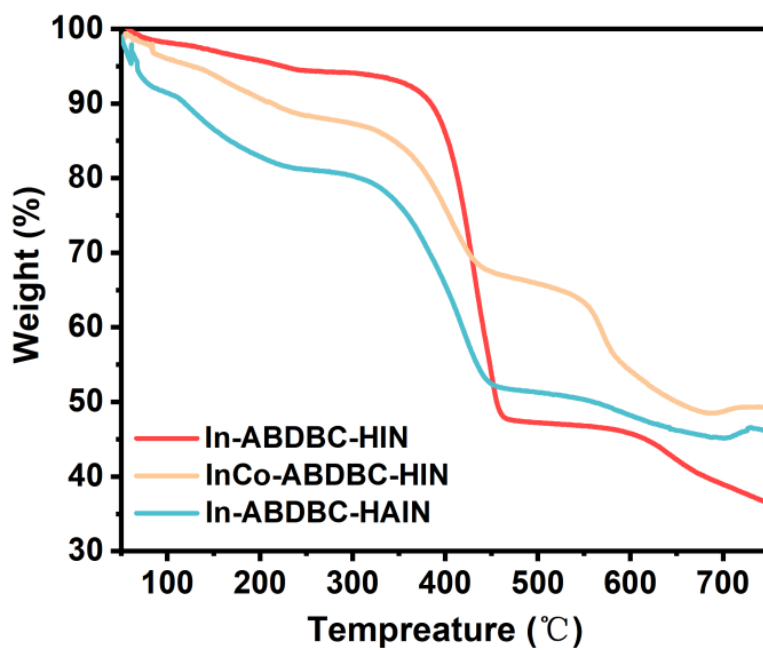

**Fig. S8** Thermogravimetric analyses (TGA) curves for synthesized In-ABDBC-HIN, InCo-ABDBC-HIN and In-ABDBC-HAIN.

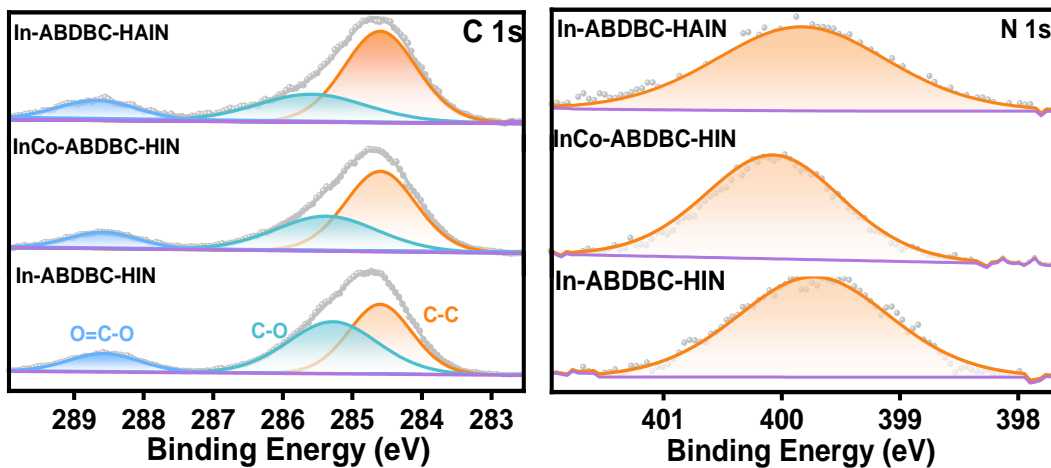

**Fig. S9** (a) C 1s and (b) N 1s XPS spectra for In-ABDBC-HIN, InCo-ABDBC-HIN and In-ABDBC-HIN.

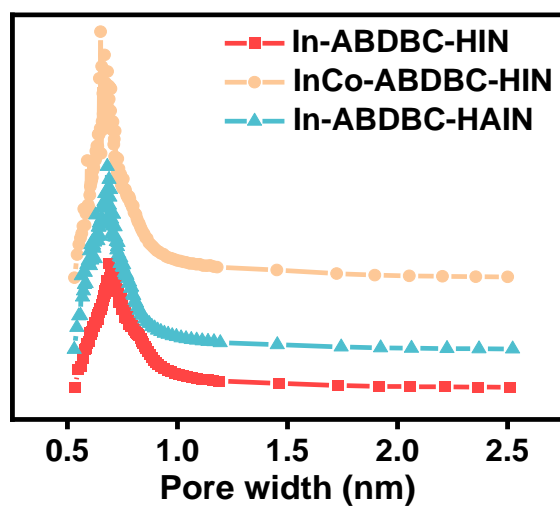

**Fig. S10** Pore size distribution calculated using the Horvath-Kawazoe method of In-ABDBC-HIN, InCo-ABDBC-HIN and In-ABDBC-HIN.

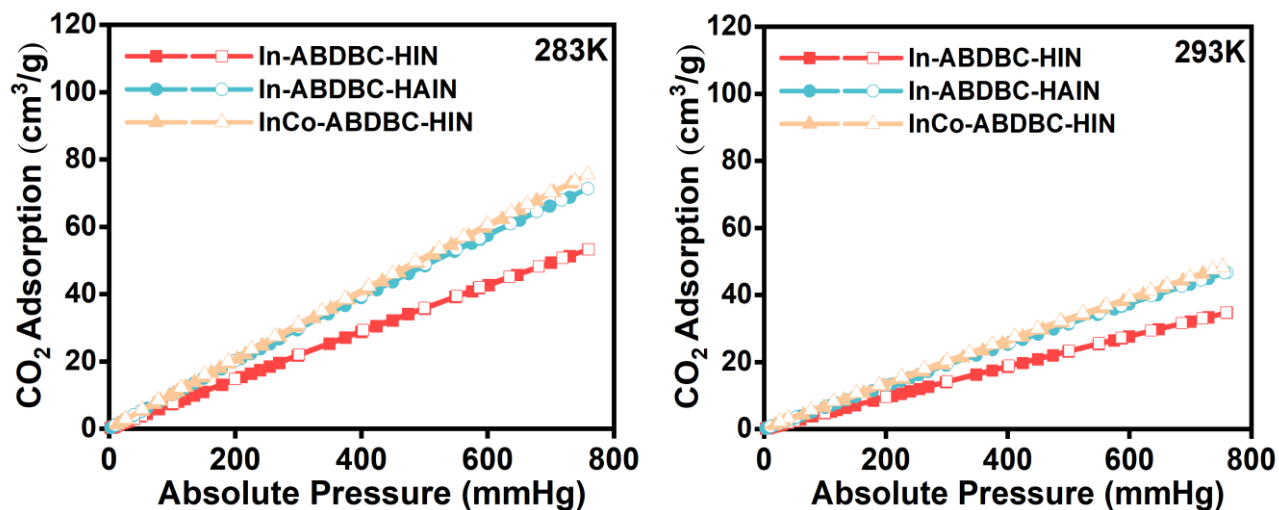

Fig. S11 Low-pressure CO<sub>2</sub> adsorption isotherms at 283K, 298K.

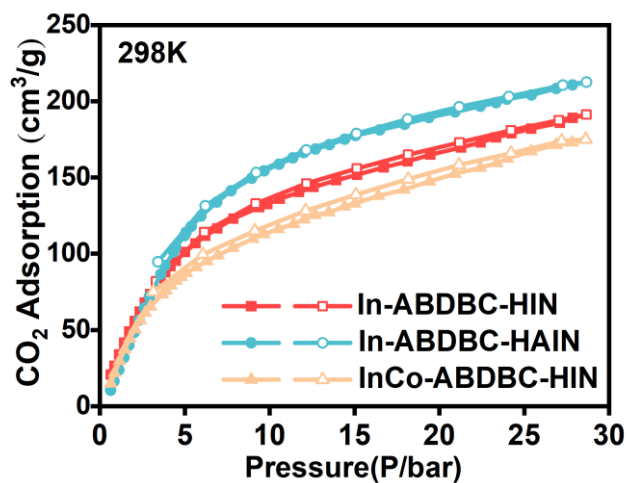

Fig. S12 High-pressure CO<sub>2</sub> adsorption isotherms at 298 K.

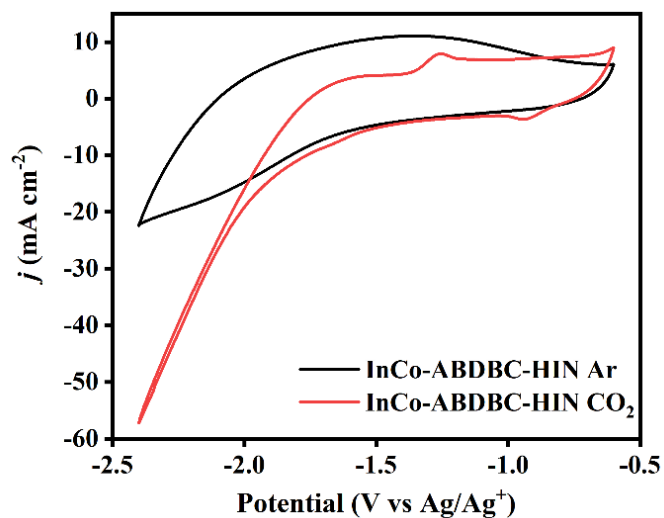

Fig. S13 CV of In-ABDBC-HIN in N<sub>2</sub>- and CO<sub>2</sub>-saturated electrolytes.

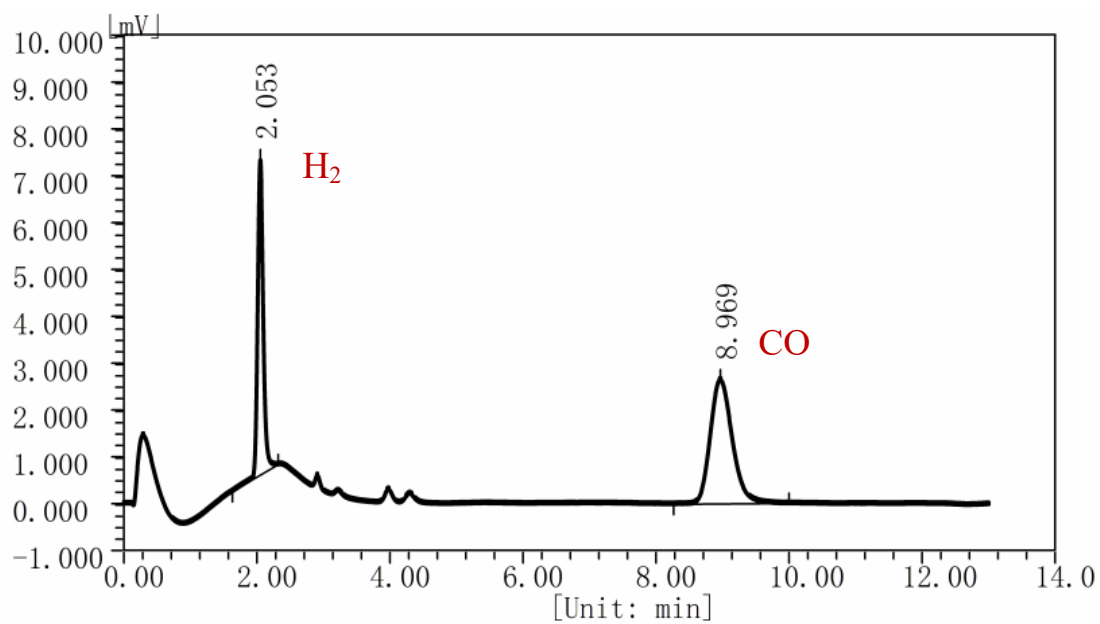

**Fig. S14** Characterization of products by gas chromatography (GC).

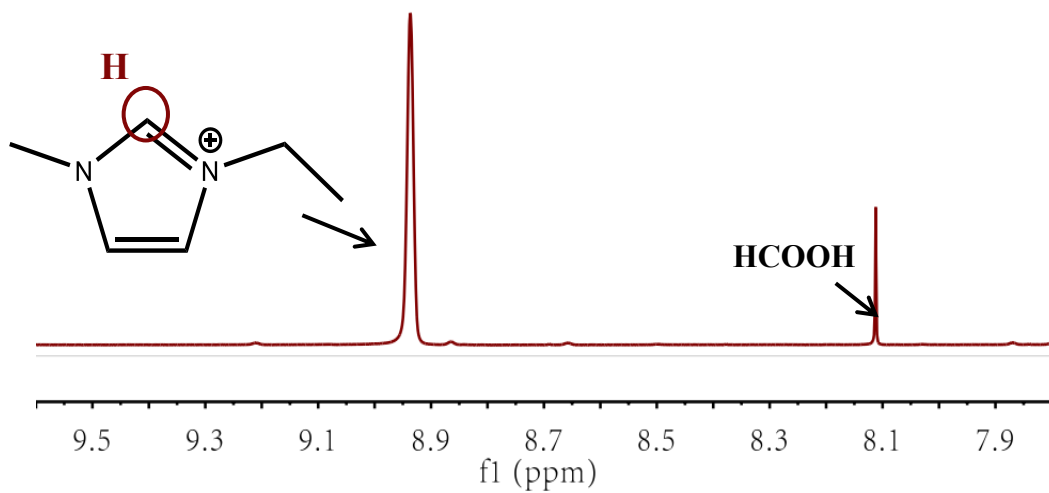

**Fig. S15** Characterization of products by  $^1H$  NMR spectroscopy.



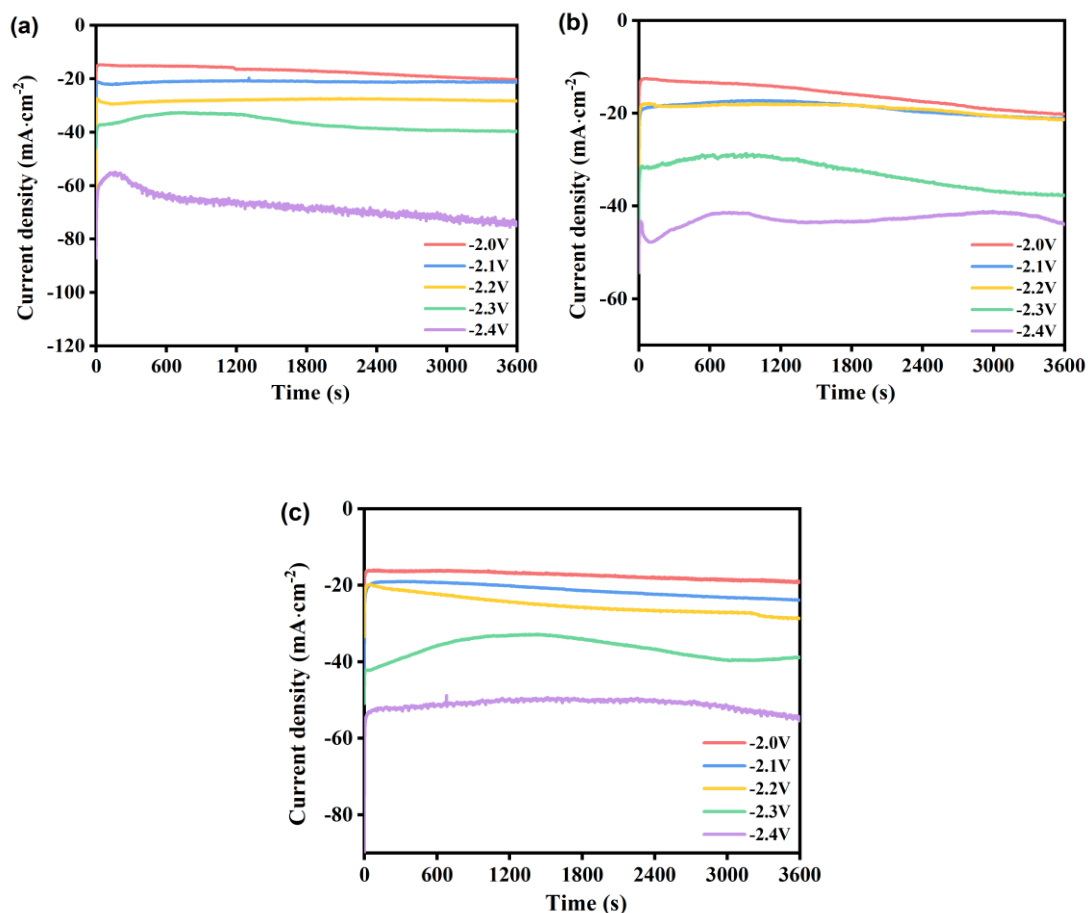

**Fig. S16** Potentiostatic current density vs. time curves of CO<sub>2</sub>RR under the condition for (a) In-ABDBC-HIN, (b) InCo-ABDBC-HIN and (c) In-ABDBC-HAIN.

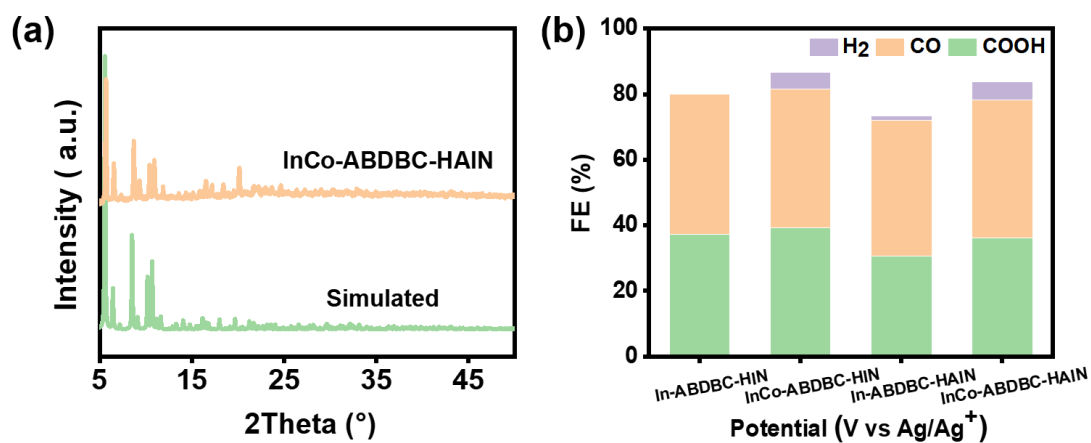

**Fig. S17** (a) XRD pattern of InCo-ABDBC-HAIN and (b) the Faraday efficiency of In-ABDBC-HIN, InCo-ABDBC-HIN, In-ABDBC-HAIN and InCo-ABDBC-HAIN at -2.2 V (vs Ag/Ag<sup>+</sup>).

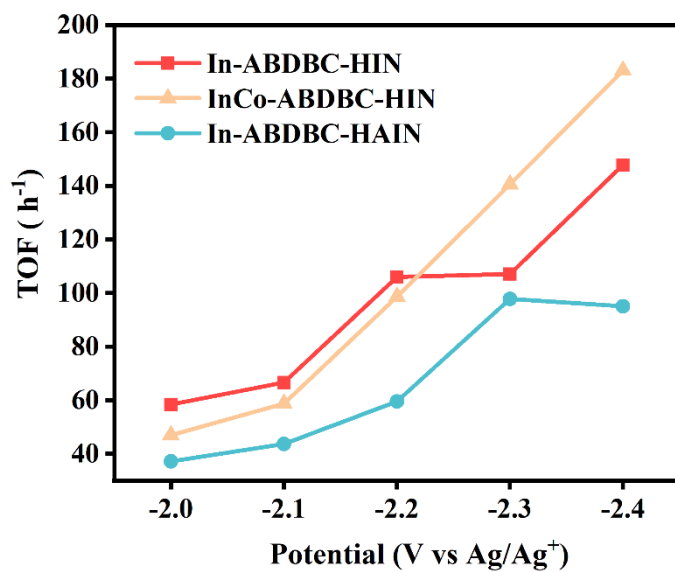

Fig. S18 TOF plots for the generation of C<sub>1</sub> products.

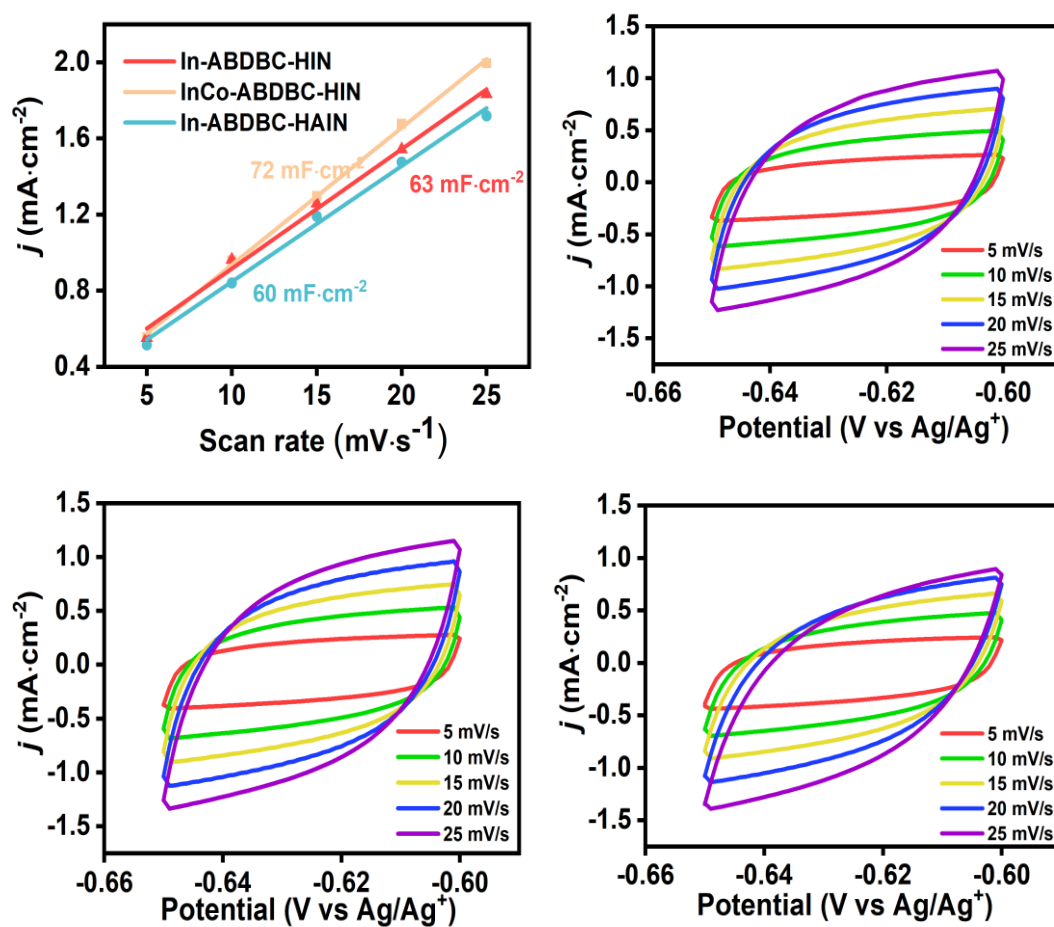

Fig. S19 ECSA of In-ABDBC-HIN, InCo-ABDBC-HIN and In-ABDBC-HAIN.

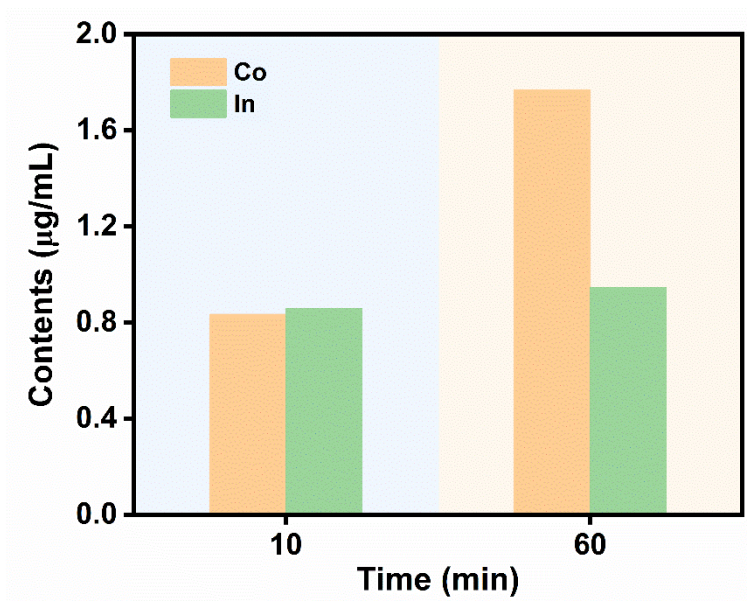

**Fig. S20** The dissolution of metal elements in the electrolyte during continuous electrocatalysis under a potential of  $-2.2$  V vs  $\text{Ag}/\text{Ag}^+$ .

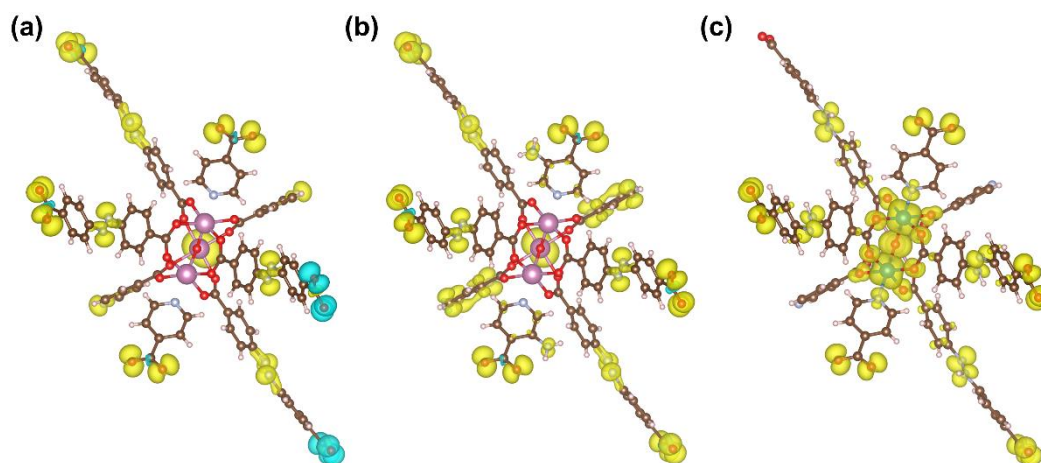

**Fig. S21** The top-view of the structure for DFT calculations and the distribution of unpaired electrons for (a) In-ABDBC-HIN, (b) In-ABDBC-HAIN, and (c) InCo-ABDBC-HIN.

**Table S1.** Crystal data and structure refinements for InCo-ABDBC-HIN

| Compound                                                   | InCo-ABDBC-HIN                                                                   |
|------------------------------------------------------------|----------------------------------------------------------------------------------|
| Empirical formula                                          | C <sub>40</sub> H <sub>27</sub> Co <sub>2</sub> InN <sub>6</sub> O <sub>14</sub> |
| Formula weight                                             | 1049.36                                                                          |
| Crystal system                                             | Cubic                                                                            |
| Space group                                                | I-43d                                                                            |
| a (Å)                                                      | 38.2668(4)                                                                       |
| b (Å)                                                      | 38.2668(4)                                                                       |
| c (Å)                                                      | 38.2668(4)                                                                       |
| α (°)                                                      | 90                                                                               |
| β (°)                                                      | 90                                                                               |
| γ (°)                                                      | 90                                                                               |
| Volume (Å <sup>3</sup> )                                   | 56036.1(19)                                                                      |
| Z                                                          | 24                                                                               |
| ρ <sub>calc</sub> /cm <sup>3</sup>                         | 0.746                                                                            |
| μ (mm <sup>-1</sup> )                                      | 0.630                                                                            |
| F(000)                                                     | 12600.0                                                                          |
| 2θ range for data collection (°)                           | 3.982 to 61.214                                                                  |
| Reflections collected/unique                               | 45055/12346                                                                      |
| R <sub>int</sub>                                           | 0.0540                                                                           |
| Parameters                                                 | 288                                                                              |
| Goodness-of-fit on F <sup>2</sup>                          | 1.000                                                                            |
| R <sub>1</sub> <sup>a</sup> , ωR <sub>2</sub> [I ≥ 2σ (I)] | R <sub>1</sub> = 0.0347, ωR <sub>2</sub> = 0.0857                                |
| R <sub>1</sub> , ωR <sub>2</sub> (all data)                | R <sub>1</sub> = 0.0493, ωR <sub>2</sub> = 0.0903                                |
| ρ <sub>fin</sub> (max/min) (e Å <sup>-3</sup> )            | 0.35/-0.54                                                                       |

**Table S2.** Selected bonded lengths (Å) and angles (°) for InCo-ABDBC-HIN

|                            |            |                            |            |
|----------------------------|------------|----------------------------|------------|
| In(1)-O(1)                 | 2.088(4)   | O(1)-Co(1) <sup>(#3)</sup> | 2.0353(19) |
| In(1)-O(7) <sup>(#1)</sup> | 2.135(3)   | C(3)-C(2)                  | 1.339(5)   |
| In(1)-O(7) <sup>(#2)</sup> | 2.135(3)   | C(3)-C(4)                  | 1.387(5)   |
| In(1)-O(8)                 | 2.141(4)   | C(7)-C(8)                  | 1.488(5)   |
| In(1)-O(2) <sup>(#3)</sup> | 2.195(3)   | C(2)-C(6)                  | 1.393(5)   |
| In(1)-O(2)                 | 2.195(3)   | C(2)-C(1)                  | 1.525(5)   |
| Co(1)-O(1)                 | 2.0354(19) | C(6)-C(5)                  | 1.379(5)   |
| Co(1)-O(4)                 | 2.088(3)   | C(8)-C(9)                  | 1.381(6)   |
| Co(1)-O(5) <sup>(#3)</sup> | 2.091(3)   | C(8)-C(13)                 | 1.423(6)   |
| Co(1)-O(6) <sup>(#1)</sup> | 2.101(3)   | C(17)-C(16)                | 1.305(7)   |
| Co(1)-O(3)                 | 2.122(2)   | C(17)-C(18)                | 1.367(7)   |
| Co(1)-N(1) <sup>(#4)</sup> | 2.164(3)   | C(17)-C(20)                | 1.513(5)   |
| O(4)-C(7)                  | 1.250(4)   | C(14)-C(15)                | 1.233(8)   |
| O(5)-C(7)                  | 1.267(5)   | C(14)-N(3)                 | 1.411(6)   |
| O(5)-Co(1) <sup>(#3)</sup> | 2.090(3)   | C(14)-C(19)                | 1.454(9)   |
| O(3)-C(1)                  | 1.245(4)   | C(13)-C(12)                | 1.418(6)   |
| N(1)-C(4)                  | 1.318(4)   | C(9)-C(10)                 | 1.344(7)   |
| N(1)-C(5)                  | 1.366(4)   | C(11)-C(12)                | 1.264(9)   |
| N(1)-Co(1) <sup>(#5)</sup> | 2.164(3)   | C(11)-C(10)                | 1.485(9)   |
| O(2)-C(1)                  | 1.231(4)   | C(11)-N(2)                 | 1.522(7)   |
| O(6)-C(20)                 | 1.262(5)   | N(3)-N(2)                  | 1.264(7)   |
| O(6)-Co(1) <sup>(#6)</sup> | 2.101(3)   | C(16)-C(15)                | 1.402(7)   |
| O(7)-C(20)                 | 1.255(5)   | C(19)-C(18)                | 1.395(7)   |
| O(7)-In(1) <sup>(#7)</sup> | 2.135(3)   |                            |            |

Symmetry (#1) $1/4+X,3/4-Z,5/4-Y$ ; (#2) $3/4-X,-1/4+Z,5/4-Y$ ; (#3) $1-X,1/2-Y,+Z$ ; (#4) $-1/2+Z,1/2-X,1-Y$ ; (#5) $1/2-Y,1-Z,1/2+X$ ; (#6) $-1/4+X,5/4-Z,3/4-Y$ ; (#7) $3/4-X,5/4-Z,1/4+Y$

**Table S3.** Comparison of various In-MOF catalysts for CO<sub>2</sub> electroreduction

| Catalysts                                                                                                                                                                           | electrolyte               | Current density (mA·cm <sup>-2</sup> ) | Main products | FE <sub>C1</sub> (%) | Ref.      |
|-------------------------------------------------------------------------------------------------------------------------------------------------------------------------------------|---------------------------|----------------------------------------|---------------|----------------------|-----------|
| <b>InCo-ABDBC-HIN</b>                                                                                                                                                               | 0.5 M EMIMBF <sub>4</sub> | 26                                     | HCOOH + CO    | 81.60                | This work |
| <b>In-ABDBC-HIN</b>                                                                                                                                                                 | 0.5 M EMIMBF <sub>4</sub> | 25                                     | HCOOH + CO    | 79.97                |           |
| <b>In-ABDBC-HAIN</b>                                                                                                                                                                | 0.5 M EMIMBF <sub>4</sub> | 19                                     | HCOOH + CO    | 71.94                |           |
| In-BDC                                                                                                                                                                              | 0.5M KHCO <sub>3</sub>    | 6.49                                   | HCOOH + CO    | 100.00               | [1]       |
| MFM-300(In)-e/In                                                                                                                                                                    | 0.5 M EMIMBF <sub>4</sub> | 46.1                                   | HCOOH         | 99.10                | [2]       |
| MFM-300(In)-t/CP                                                                                                                                                                    | 0.5 M EmimBF <sub>4</sub> | 28.4                                   | HCOOH         | 68.10                | [2]       |
| MFM-300(In)-e/CP                                                                                                                                                                    | 0.5 M EmimBF <sub>4</sub> | 28                                     | HCOOH         | 81.50                | [2]       |
| (Me <sub>2</sub> NH <sub>2</sub> <sup>+</sup> ){In <sup>III</sup> -[Ni(C <sub>2</sub> S <sub>2</sub> (C <sub>6</sub> H <sub>4</sub> COO) <sub>2</sub> )]}·3D MF·1.5H <sub>2</sub> O | 0.5 M KHCO <sub>3</sub>   | 36                                     | HCOOH + CO    | 91.47                | [3]       |
| (Me <sub>2</sub> NH <sub>2</sub> <sup>+</sup> )[In <sup>III</sup> -(TTFTB)]·0.7C <sub>2</sub> H <sub>5</sub> OH·DMF                                                                 | 0.5 M KHCO <sub>3</sub>   | 14.3                                   | HCOOH + CO    | 60.17                | [3]       |
| MIL-68(In)-NH <sub>2</sub>                                                                                                                                                          | 0.1M KHCO <sub>3</sub>    | 108                                    | HCOOH         | 94.40                | [4]       |
| CPs@V11                                                                                                                                                                             | 0.5 M KHCO <sub>3</sub>   | 6.87                                   | HCOOH         | 90.30                | [5]       |
| V11                                                                                                                                                                                 | 0.5 M KHCO <sub>3</sub>   | 2.97                                   | HCOOH         | 72.20                | [5]       |
| PF-110                                                                                                                                                                              | 0.5 M KHCO <sub>3</sub>   | 2.97                                   | HCOOH         | 64.00                | [5]       |
| ZJU-28                                                                                                                                                                              | 0.5 M KHCO <sub>3</sub>   | 2.28                                   | HCOOH         | 58.00                | [5]       |
| MIL-68                                                                                                                                                                              | 0.5 M KHCO <sub>3</sub>   | 0.94                                   | HCOOH         | 54.00                | [5]       |
| CPM-5                                                                                                                                                                               | 0.5 M KHCO <sub>3</sub>   | 0.75                                   | HCOOH         | 39.50                | [5]       |

## Section S3. References

- [1] S. Z. Hou, X. D. Zhang, W. W. Yuan, Y. X. Li and Z. Y. Gu, Indium-Based Metal-Organic Framework for High-Performance Electroreduction of CO<sub>2</sub> to Formate, *Inorg. Chem.*, 2020, **59**, 11298-11304.
- [2] X. Kang, B. Wang, K. Hu, K. Lyu, X. Han, B. F. Spencer, M. D. Frogley, F. Tuna, E. J. L. McInnes, R. A. W. Dryfe, B. Han, S. Yang and M. Schroder, Quantitative Electro-Reduction of CO<sub>2</sub> to Liquid Fuel over Electro-Synthesized Metal-Organic Frameworks, *Angew. Chem. Int. Ed.*, 2020, **142**, 17384-17392.
- [3] Y. Zhou, S. Liu, Y. Gu, G. H. Wen, J. Ma, J. L. Zuo and M. Ding, In(III) Metal-Organic Framework Incorporated with Enzyme-Mimicking Nickel Bis(dithiolene) Ligand for Highly Selective CO<sub>2</sub> Electroreduction, *Angew. Chem. Int. Ed.*, 2021, **143**, 14071-14076.
- [4] Z. Wang, Y. Zhou, C. Xia, W. Guo, B. You and B. Y. Xia, Efficient Electroconversion of Carbon Dioxide to Formate by a Reconstructed Amino-Functionalized Indium-Organic Framework Electrocatalyst, *Angew. Chem. Int. Ed.*, 2021, **60**, 19107-19112.
- [5] Z. H. Zhu, B. H. Zhao, S. L. Hou, X. L. Jiang, Z. L. Liang, B. Zhang and B. Zhao, A Facile Strategy for Constructing a Carbon-Particle-Modified Metal-Organic Framework for Enhancing the Efficiency of CO<sub>2</sub> Electroreduction into Formate, *Angew. Chem. Int. Ed.*, 2021, **60**, 23394-23402.
